# Supplementary material for: Synthesis of graphene aerogels using cyclohexane and n-butanol as soft templates
Source: Royal Society of Chemistry journal article supplement (doi:10.1039/c9ra10988a), 2020-01-01
Supplement: c9ra10988a1.pdf [file c9ra10988a1.pdf]

## Synthesis of graphene aerogels using cyclohexane and n-butanol as soft template

Xin Zhang<sup>a</sup>, Jie Su<sup>a</sup>, Xueyuan Wang<sup>a</sup>, Xiaolei Tong<sup>a</sup>, Fanglian Yao<sup>a,b</sup>, and Caideng Yuan<sup>\*,a,b</sup>

### Supporting

#### Experimental methods

**Synthesis of graphene oxide (GO):** Graphene oxide was prepared by a modified Hummers method<sup>1</sup>. Typically, a 9:1 mixture of concentrated H<sub>2</sub>SO<sub>4</sub>/H<sub>3</sub>PO<sub>4</sub>(270:30 ml) was added to a beaker with 3 g graphite flakes (80 mesh). The mixture was cooled to 2°C and stirred for 2h, then 13.5g KMnO<sub>4</sub> was added to the beaker in batches for about 1h. The reaction was then heated to 50°C and stirred for 6h, after that, 300 ml of water was slowly added to the beaker, producing a severe exotherm to 80-100°C. After the mixture was naturally cooled, the remaining KmnO<sub>4</sub> was removed by 10 ml H<sub>2</sub>O<sub>2</sub>(30%) and produced a lot of bubbles. For workup, the mixture was washed twice with 1 mol/l hydrochloric acid, then was washed with deionized water to neutrality and dried for use.

#### Characterization of graphene oxide

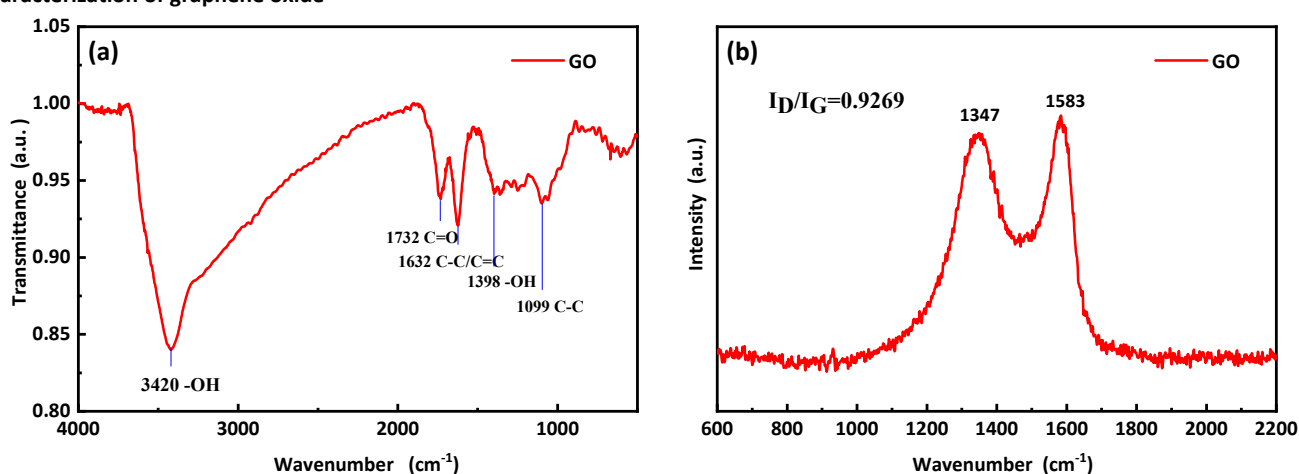

Fig. S1: (a) FTIR spectra of GO, (b) Raman spectra recorded using 514 nm laser excitation

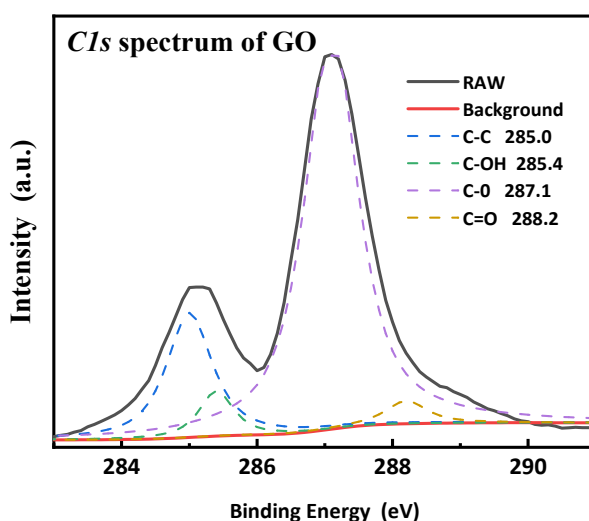

Fig. S2: C1s XPS spectra of GO

<sup>a</sup> Department of Polymer Science and Engineering, School of Chemical Engineering and Technology, Tianjin University, Tianjin 300350, P. R. China.

<sup>b</sup> Tianjin University-UCGM Joint Research Center of Graphene Application, Tianjin University, Tianjin 300350, P. R. China.

\* Correspondence author: C. Yuan, e-mail: cdyuan@tju.edu.cn.

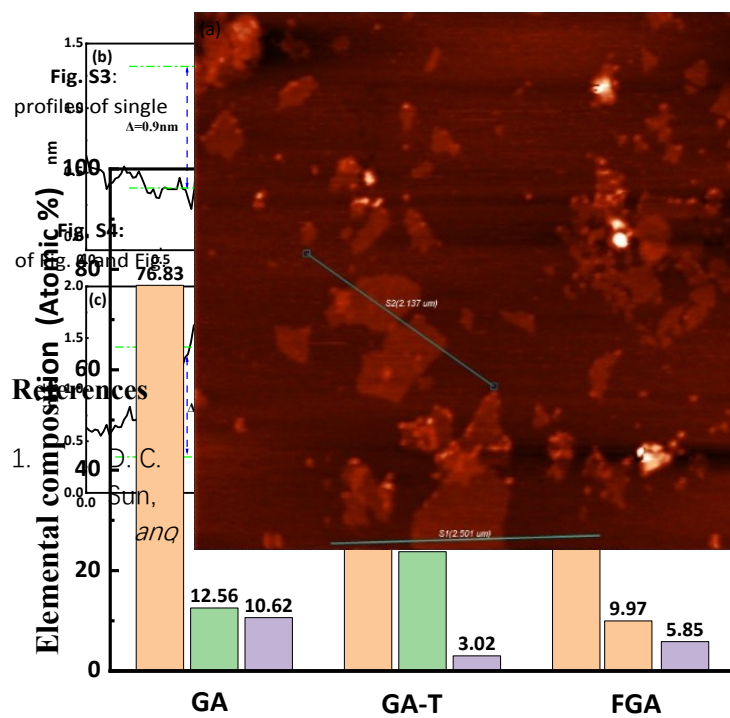

(a) Tapping mode AFM topographic images, (b) and (c) height profiles of single GO sheets

elemental analysis of GA, GA-T and FGA (referred to XPS analysis 5 in the main document)

Marcano, D. V. Kosynkin, J. M. Berlin, A. Sinitskii, Z. Z. A. Slesarev, L. B. Alemany, W. Lu and J. M. Tour, *ACS* 2010, **4**, 4806-4814.
